# Supplementary material
Source: ML conference proceedings conference paper supplement (https://openaccess.thecvf.com/content/ICCV2023/html/Wang_Why_do_networks_ICCV_2023_paper.html)
Supplement: Supplementary file 1 [file Wang_Why_do_networks_ICCV_2023_supplemental.pdf]

## A. Appendix - Proofs

*Proof of Lemma 3.1.* By definition 3.3, it suffices to prove  $\forall i \in [n], T_i(\mathbf{x}) \leq T_i(\mathbf{y})$ . Let  $w_{ij}$  be the  $i$ th row and  $j$ th column component of  $\mathbf{W}$ :

$$\begin{aligned} T_i(\mathbf{x}) - T_i(\mathbf{y}) &= \left( \sum_{j \in [m]} w_{ij}x_j + b_i \right) - \left( \sum_{j \in [m]} w_{ij}y_j + b_i \right) \\ &= \sum_{j \in [m]} w_{ij}(x_j - y_j) \\ &\leq 0 \end{aligned}$$

□

*Proof of Theorem 3.1.*  $\text{DNN}^+$  is a composition of monotone functions: layers of non-decreasing activation functions  $\Phi$  and affine transformation with all non-negative weights  $T : \mathbb{R}^m \rightarrow \mathbb{R}^n$  (Lemma 3.1). By closure of monotone function under compositionality, we have that  $\text{DNN}^+$  is an order-preserving monotone function. □

*Proof of Corollary 3.1.1.* Without loss of generality, we assume the feature index pair  $i, j \in [n]$  satisfy  $a_i a_j < 0$ . Let  $\mathbf{d} = (d_1, \dots, d_i, \dots, d_j, \dots, d_n)$  be a point on the segment, i.e.,  $\mathbf{a}\mathbf{d} + b = 0$ . Now we construct three points  $A, B, C$  with  $\epsilon > 0$ .<sup>4</sup>

$$A = (d_1, \dots, d_i - \epsilon, \dots, d_j, \dots, d_n) \quad (14)$$

$$B = (d_1, \dots, d_i + \epsilon, \dots, d_j, \dots, d_n) \quad (15)$$

$$C = (d_1, \dots, d_i + \epsilon, \dots, d_j - 2\frac{a_i}{a_j}\epsilon, \dots, d_n) \quad (16)$$

First since  $a_i a_j < 0$  and  $\epsilon > 0$ , we have  $2\frac{a_i}{a_j}\epsilon < 0$ , thus

$$\begin{cases} x_i^A < x_i^B = x_i^C \\ x_j^A = x_j^B < x_j^C \end{cases} \implies A \preceq B \preceq C \\ \implies F^+(A) \leq F^+(B) \leq F^+(C) \quad (17)$$

Simultaneously, from  $\mathbf{a}\mathbf{d} + b = 0$ , we also have

$$\begin{cases} \mathbf{a}A + b = \mathbf{a}\mathbf{d} + b - a_i\epsilon & = -a_i\epsilon \\ \mathbf{a}B + b = \mathbf{a}\mathbf{d} + b + a_i\epsilon & = a_i\epsilon \\ \mathbf{a}C + b = \mathbf{a}\mathbf{d} + b + a_i\epsilon - 2\frac{a_i}{a_j}a_j\epsilon & = -a_i\epsilon \end{cases}$$

Then  $A, C$  must lie on the same side of  $L$  but different than  $B$ , thus  $f(A) = f(C) \neq f(B)$ . By the same logic as in Theorem 3.3, this contradicts with Eq 17; therefore,  $\text{DNN}^+$  cannot solve classification problems where the decision boundaries  $\{L\}$  have any segment  $L$  with a normal  $\mathbf{a} = (a_1, \dots, a_n)$  where  $\exists i \neq j \in [n], a_i a_j < 0$ . □

<sup>4</sup>For the choice of  $\epsilon$  under non-linear decision boundary scenario, we assume here we can always find  $\epsilon$  such that it is larger than the linear approximation error. For more details, please see Remark 5

*Proof of Corollary 3.1.2.* Without loss of generality, let's assume region  $R_0 \in \{R\}$  is a closed set. We denote all points in  $R_0$  as a general form  $\mathbf{x} = (x_1, \dots, x_n)$ . Consider any point  $B = (x_1^B, \dots, x_n^B) \in R_0$ , we can always find two points  $A', C' \in \partial R$  that follow  $A' \preceq B \preceq C'$  with the following construction method:

$$A' = (\min(x_1), x_2^B, \dots, x_n^B)$$

$$C' = (\max(x_1), x_2^B, \dots, x_n^B)$$

As we move  $\epsilon > 0$  away from the boundary, we can further construct two points  $A, C \notin R_0$  where

$$A = (\min(x_1) - \epsilon, x_2^B, \dots, x_n^B)$$

$$C = (\max(x_1) + \epsilon, x_2^B, \dots, x_n^B)$$

Thus  $A \preceq B \preceq C \implies F^+(A) \leq F^+(B) \leq F^+(C)$ , yet we have  $B \in R_0$  while  $A, C \notin R_0 \implies f(A) = f(C) \neq f(B)$ . By the same reasoning as in theorem 3.3, we have a contradiction thus a  $\text{DNN}^+$  cannot solve problems where the decision boundary forms a closed set. □

*Proof of Corollary 3.1.3.* Without loss of generality, we assume  $R_0, R_1$  are disconnected and belong to the same class, i.e.,  $f(x) = c_1, \forall x \in R_0 \cup R_1$ ,  $c_1$  is a constant. Now consider any pair of points  $(A, B), A \in R_0, B \in R_1$ , the straight line segment  $AB$  that connects  $A$  and  $B$  must pass through another class by Definition 4.4. This means we must have point  $C$  on line  $AB$ , but  $f(c) = c_2 \neq c_1$  where  $c_2$  is a constant. Next, we discuss the order relationship between  $A$  and  $B$ :

**case 1** **Exists such a pair  $A \preceq B$ .** Then since  $A, C, B$  are colinear and  $C$  is in between  $A$  and  $B$ , we have  $A \preceq C \preceq B \implies F^+(A) \leq F^+(C) \leq F^+(B)$ . Yet by construction, we also have  $f(A) = f(B) \neq f(C)$ . By the same reasoning as in Theorem 3.3, we have a contradiction. Thus, a  $\text{DNN}^+$  cannot solve classification problems that fall into this case.

**case 2** **Does NOT exist such a pair  $A \preceq B$ .** This means for all pairs of points in the two disconnected regions, they don't follow the ordering defined in Definition 3.3. Thus, there exists two input dimensions,  $i, j \in [n]$ , such that for all  $\mathbf{x}^0 = (\dots, x_i^0, \dots, x_j^0, \dots) \in R_0$ , and for all  $\mathbf{x}^1 = (\dots, x_i^1, \dots, x_j^1, \dots) \in R_1$ , they follow

$$\begin{cases} x_i^0 < t_i < x_i^1 \\ x_j^0 > t_j > x_j^1 \end{cases}, t_1, t_2 \in \mathbb{R} \quad (18)$$

Now, for a point  $G = (\dots, x_i^F, \dots, x_j^F, \dots) \in R_0$ , we always have  $x_i^G < t_i$  and  $x_j^G > t_j$ . Further, we can always

construct two more points  $D, E \in (K - R_0 - R - 1)$  by

$$\begin{aligned} D &= (\dots, x_i^G, \dots, t_j, \dots) \\ E &= (\dots, t_i, \dots, x_j^G, \dots) \end{aligned}$$

Thus we have  $D \preceq G \preceq E \implies F^+(D) \leq F^+(G) \leq F^+(E)$ . However, since we have  $F \in R_0$  and yet  $D, E \in (K - R_0 - R - 1)$ , we therefore have  $f(D) = f(E) \neq f(G)$ . By the same reasoning as in theorem 3.3, we have a contradiction. Thus, a  $\text{DNN}^+$  cannot solve classification problems that fall into this case.

Collectively, we proved that a  $\text{DNN}^+$  cannot solve a classification problem where there exists a class that is a disconnected space.  $\square$
